# Supplementary material for: Ground beetles (Coleoptera: Carabidae) of rice field banks and restored habitats in an agricultural area of the Po Plain (Lombardy, Italy)
Source: Biodivers Data J. 2013 Nov 11;(1):e972. doi: 10.3897/BDJ.1.e972 (PMC3964715; doi:10.3897/BDJ.1.e972)
Supplement: Supplementary file 99 — Authors: Nicola Pilon, Elisa Cardarelli, Giuseppe Bogliani Data type: occurrences In 2009 and 2010, ground beetles (ColeopteraCarabidae) were sampled in an agricultural area of the Po plain (Lombardy, Italy), by means of pitfall traps. The dataset reported frequency (N) and annual Activity Density (AD) of collected species in: (a) rice field banks; (b) herbaceous buffer strips; (c) arboreal buffer strips; (d) herbaceous restored habitats, i.e. wet and dry meadows; (e) arboreal restored habitats, i.e. forested areas and hedges. File: Pilon_Carabidae_SupplementaryFile.xls [file biodiversity_data_journal-1-e972-s001.xls]

## Sheet: Readme
	GBIF Global Names Architecture Darwin Core Archive format
	Basic Species Checklist Template - Standard Linnaean Classification
	Checklist-3_v1
	Use this template to record a basic columnar species checklist with limited annotations
Sheet Name	Purpose
Metadata	This sheet has the following sub sections. Each section has terms (in bold) and sample data.
Basic Metadata	This section is used to record the basic metadata about the classification.
People and Organizations	This section is used to record the authors of the metadata and of the classification.
Keywords and Coverage	This section records resource scope data
References	This section stores bibliographic references that support the data or data capture methods.
	This worksheet, when properly completed, can be transformed to a Ecological Metadata Language document using the GBIF Spreadsheet Processor that conforms to the GBIF EML Profile at http://rs.gbif.org/schema/eml-gbif-profile/dev/eml.xsd
Classification	This sheet is used to record the classification. The first row of this sheet has terms (in bold) and additional rows have sample data.
	Use this template to record species checklists in a simple columnar format that stores the basic taxonomic data in the following columns (Kingdom, Phylum, Subphylum, Class, Order, Family, Genus, Species, Infraspecies). Additional fields include entries for synonyms, common names, and distribution and other elements.
Instructions and definitions are obtained by hovering your cursor over cells with red upper-right corners.
	Select worksheets for data entry by selecting via the labeled tabs at the bottom of the screen
	Note 1: The classification worksheet includes sample data to illustrate the use of some of the data fields. Make sure to clear this sample data before using the worksheet.
	Note 2: Please do not modify this template by adding or deleting any row or column. As this would prevent the Speadsheet Processor from getting correct values. We aim to provide a more flexible template according to feedbacks from users in the future.

## Sheet: Metadata
Basic Metadata	Required fields are listed with an asterisk (*) next to the field label							Research Project
								Title	CORINAT (“COltivazione delle RIsaie di elevato valore biologico e NATuralistico” - “Cultivation of rice fields of high biological and naturalistic value”)
Universally Unique Identifier (UUID)	ed946fa8-8409-4c72-ba2f-e1811b99e449							Lead Organisation	Dept. of Earth and Environmental Sciences, University of Pavia, Via Adolfo Ferrata 9, 27100 Pavia		Country	Italy
* Title	Ground beetles (Coleoptera Carabidae) of rice field banks and restored habitats in an agricultural area of the Po Plain (Lombardy, Italy)							Description	The project had the aim to evaluate cost-effective agri-environmental measures able to combine the benefit for biodiversity and the economic viability of rice agriculture (funding: Lombardy Region, Italy).
* Publication Date (MM/DD/YYYY)
* Expected Citation	Pilon N, Cardarelli E, Bogliani G (2013) Ground beetles (Coleoptera Carabidae) of rice field banks and restored habitats in an agricultural area of the Po Plain (Lombardy, Italy). Biodiversity Data Journal
* Abstract or concise description of the dataset	In 2009 and 2010, ground beetles (Coleoptera Carabidae) were sampled in an agricultural area of the Po plain (Lombardy, Italy), by means of pitfall traps. The dataset reported frequency (N) and annual Activity Density (AD) of collected species in: (a) rice field banks; (b) herbaceous buffer strips; (c) arboreal buffer strips; (d) herbaceous restored habitats, i.e. wet and dry meadows; (e) arborea…
Additional information
Resource Language	English		Metadata Language		English
Resource URL			Resource Logo URL
Creative Commons Licensing	by-nc-sa
People and Organizations
Note: select agent roles from pulldown list (in rows 19-30)
	First Name	Last Name	Organization	Phone	Email	Homepage	Address	City	State/Province	Country	Zip/Postal Code	* Primary Contact
* Resource Creator	Elisa	Cardarelli	Dept. of Earth and Environmental Sciences, University of Pavia	0039 0382 986830	elisa.cardarelli@unipv.it		Via Adolfo Ferrata 9	Pavia	Lombardy	Italy	27100	Yes
* Metadata Author	Elisa	Cardarelli	Dept. of Earth and Environmental Sciences, University of Pavia	0039 0382 986830	elisa.cardarelli@unipv.it		Via Adolfo Ferrata 9	Pavia	Lombardy	Italy	27100	Yes
Author	Nicola	Pilon	Elitron	0039 02 39410885	nicola@elitron.mi.it		via Capri 11/3	Milano	Lombardy	Italy	20153
Author	Elisa	Cardarelli	Dept. of Earth and Environmental Sciences, University of Pavia	0039 0382 986830	elisa.cardarelli@unipv.it		Via Adolfo Ferrata 9	Pavia	Lombardy	Italy	27100
Author	Giuseppe	Bogliani	Dept. of Earth and Environmental Sciences, University of Pavia	0039 0382 986303	bogliani@unipv.it		Via Adolfo Ferrata 9	Pavia	Lombardy	Italy	27100
Author
Author
Author
Author
Author
Author
Author
Author
Author
Keywords and Coverage					Latitude and longitude values are used to create a 'bounding box' containing the region of interest.
Regional Scope	Lacchiarella (Milano) and Giussago (Pavia), Lombardy, Italy				Bounding Box	Decimal Lat.	Decimal Long.
General Keywords	Carabidae, agroecosystem, rice fields, habitat restoration, Italy, Po plain.				Upper Left	45°18'2.39"N	9° 6'47.60"E
Keyword Thesaurus					Lower right	45°16'51.60"N	9°10'5.33"E
Begin Date or Single Date	April 2009
End Date	November 2010
Taxonomic Keywords	Coleoptera Carabidae
References	Use the fields below to record bibliographic citations. Copy and paste additional rows to accommodate more citations.
Reference	Vigna Taglianti A (2010) Fauna Europea: Carabidae. In: Audisio P. (Ed.), Fauna Europea: Coleoptera 2. Fauna Europaea version 2.2, http://www.faunaeur.org, accessed: 7 March 2013.
Reference
Reference
Reference
Reference
Reference
Reference
Reference
Reference
Reference
Reference

## Sheet: Pilon_Carabid_SupplementaryFile
Species	Year	Rice field banks		Buffer strips				Restored habitats
				herbaceous		arboreal		herbaceous		arboreal
		N	AD	N	AD	N	AD	N	AD	N	AD
Acinopus picipes (Olivier 1795)	2009	0	0	0	0	0	0	0	0	1	0.002
	2010	0	0	0	0	0	0	0	0	1	0.001
Acupalpus elegans (Dejean 1829)	2009	0	0	0	0	0	0	0	0	0	0
	2010	0	0	0	0	0	0	1	0.003	0	0
Acupalpus flavicollis (Sturm 1825)	2009	0	0	0	0	0	0	0	0	1	0.002
	2010	0	0	0	0	0	0	0	0	0	0
Acupalpus maculatus (Schaum 1860)	2009	5	0.006	8	0.014	0	0	0	0	1	0.002
	2010	0	0	1	0.001	0	0	2	0.005	1	0.001
Acupalpus notatus Mulsant & Rey 1861	2009	0	0	0	0	0	0	0	0	1	0.002
	2010	0	0	0	0	0	0	0	0	0	0
Agonum emarginatum (Gyllenhal 1827)	2009	13	0.016	0	0	0	0	0	0	3	0.006
	2010	1	0.001	2	0.003	1	0.004	3	0.008	84	0.086
Agonum muelleri (Herbst 1784)	2009	4	0.005	0	0	0	0	0	0	0	0
	2010	3	0.003	0	0	0	0	1	0.003	0	0
Agonum sexpunctatum (Linné 1758)	2009	1	0.001	0	0	0	0	0	0	0	0
	2010	0	0	0	0	0	0	0	0	0	0
Agonum versutum Sturm 1824	2009	0	0	0	0	0	0	0	0	2	0.004
	2010	0	0	0	0	0	0	0	0	0	0
Agonum viduum (Panzer 1796)	2009	0	0	0	0	0	0	0	0	1	0.002
	2010	0	0	0	0	0	0	0	0	7	0.007
Amara aenea (De Geer 1774)	2009	198	0.245	423	0.72	2	0.011	30	0.138	2	0.004
	2010	104	0.092	357	0.51	0	0	49	0.131	15	0.015
Amara bifrons (Gyllenhal 1810)	2009	0	0	1	0.002	0	0	0	0	0	0
	2010	1	0.001	0	0	0	0	0	0	0	0
Amara communis (Panzer 1797)	2009	0	0	0	0	0	0	0	0	3	0.006
	2010	1	0.001	0	0	1	0.004	1	0.003	1	0.001
Amara familiaris (Duftschmid 1812)	2009	3	0.004	4	0.007	0	0	1	0.005	0	0
	2010	0	0	1	0.001	0	0	0	0	1	0.001
Amara fulvipes (Audinet-Serville 1821)	2009	0	0	1	0.002	0	0	0	0	0	0
	2010	0	0	1	0.001	0	0	2	0.005	0	0
Amara littorea C.G. Thomson 1857	2009	0	0	0	0	0	0	0	0	0	0
	2010	0	0	1	0.001	0	0	0	0	0	0
Amara lucida (Duftschmid 1812)	2009	9	0.011	10	0.017	0	0	0	0	0	0
	2010	4	0.004	6	0.009	1	0.004	0	0	1	0.001
Amara nitida Sturm 1825	2009	0	0	0	0	0	0	0	0	0	0
	2010	12	0.011	0	0	0	0	0	0	0	0
Amara similata (Gyllenhal 1810)	2009	27	0.033	96	0.163	1	0.006	0	0	0	0
	2010	27	0.024	47	0.067	0	0	5	0.013	0	0
Amblystomus niger (Heer 1841)	2009	0	0	5	0.009	0	0	0	0	0	0
	2010	0	0	0	0	0	0	2	0.005	0	0
Anchomenus dorsalis (Pontoppidan 1763)	2009	19	0.024	12	0.02	0	0	2	0.009	0	0
	2010	6	0.005	28	0.04	2	0.009	36	0.097	129	0.132
Anisodactylus binotatus (Fabricius 1787)	2009	155	0.192	152	0.259	2	0.011	29	0.133	8	0.015
	2010	91	0.081	182	0.26	4	0.018	99	0.266	39	0.04
Anisodactylus signatus (Panzer 1796)	2009	109	0.135	283	0.481	2	0.011	3	0.014	1	0.002
	2010	58	0.052	330	0.472	0	0	10	0.027	2	0.002
Badister bullatus (Schrank 1798)	2009	2	0.002	0	0	2	0.011	0	0	1	0.002
	2010	0	0	0	0	2	0.009	1	0.003	3	0.003
Badister sodalis (Duftschmid 1812)	2009	0	0	0	0	0	0	0	0	0	0
	2010	0	0	0	0	1	0.004	0	0	0	0
Bembidion quadrimaculatum (Linné 1761)	2009	41	0.051	777	1.322	6	0.034	6	0.028	13	0.024
	2010	3	0.003	0	0	0	0	19	0.051	1	0.001
Bembidion quadripustulatum Audinet-Serville 1821	2009	0	0	5	0.009	0	0	0	0	0	0
	2010	0	0	0	0	0	0	0	0	0	0
Brachinus elegans Chaudoir 1842	2009	88	0.109	157	0.267	2	0.011	24	0.11	10	0.019
	2010	8	0.007	410	0.586	0	0	290	0.778	12	0.012
Brachinus explodens Duftschmid 1812	2009	1	0.001	0	0	0	0	0	0	0	0
	2010	0	0	1	0.001	0	0	0	0	0	0
Brachinus glabratus Latreille & Dejean 1822	2009	2	0.002	5	0.009	0	0	7	0.032	0	0
	2010	0	0	0	0	0	0	0	0	0	0
Brachinus plagiatus Reiche 1868	2009	3	0.004	2	0.003	0	0	0	0	0	0
	2010	0	0	21	0.03	0	0	0	0	0	0
Brachinus sclopeta (Fabricius 1792)	2009	0	0	84	0.143	0	0	5	0.023	0	0
	2010	5	0.004	276	0.394	0	0	1	0.003	1	0.001
Bradycellus verbasci (Duftschmid 1812)	2009	0	0	0	0	0	0	0	0	0	0
	2010	0	0	2	0.003	0	0	0	0	0	0
Calathus fuscipes (Goeze 1777)	2009	1	0.001	0	0	0	0	0	0	1	0.002
	2010	5	0.004	0	0	1	0.004	0	0	0	0
Calathus melanocephalus (Linné 1758)	2009	35	0.043	3	0.005	0	0	22	0.101	14	0.026
	2010	52	0.046	12	0.017	0	0	2	0.005	37	0.038
Calosoma auropunctatum (Herbst 1784)	2009	0	0	75	0.128	0	0	15	0.069	9	0.017
	2010	0	0	12	0.017	0	0	4	0.011	0	0
Carabus granulatus Linné 1758	2009	0	0	0	0	0	0	1	0.005	40	0.074
	2010	0	0	3	0.004	0	0	1	0.003	19	0.019
Chlaeniellus nitidulus (Schrank 1781)	2009	42	0.052	3	0.005	2	0.011	0	0	1	0.002
	2010	34	0.03	9	0.013	4	0.018	2	0.005	26	0.027
Chlaeniellus tristis (Schaller 1783)	2009	0	0	0	0	0	0	0	0	1	0.002
	2010	0	0	1	0.001	0	0	0	0	2	0.002
Chlaenius spoliatus (P. Rossi 1792)	2009	5	0.006	4	0.007	0	0	1	0.005	6	0.011
	2010	40	0.036	3	0.004	1	0.004	1	0.003	1	0.001
Cicindela campestris Linné 1758	2009	1	0.001	0	0	0	0	0	0	0	0
	2010	0	0	0	0	0	0	0	0	0	0
Clivina collaris (Herbst 1784)	2009	1	0.001	0	0	0	0	0	0	0	0
	2010	0	0	0	0	0	0	0	0	0	0
Clivina fossor (Linné 1758)	2009	0	0	2	0.003	0	0	5	0.023	0	0
	2010	1	0.001	3	0.004	4	0.018	10	0.027	3	0.003
Diachromus germanus (Linné 1758)	2009	6	0.007	64	0.109	0	0	4	0.018	0	0
	2010	7	0.006	40	0.057	0	0	37	0.099	3	0.003
Dinodes decipiens (L. Dufour 1820)	2009	0	0	0	0	0	0	0	0	0	0
	2010	2	0.002	0	0	0	0	1	0.003	0	0
Dolichus halensis (Schaller 1783)	2009	0	0	3	0.005	0	0	0	0	0	0
	2010	0	0	2	0.003	0	0	0	0	0	0
Drypta dentata (P. Rossi 1790)	2009	0	0	0	0	1	0.006	0	0	0	0
	2010	0	0	0	0	0	0	0	0	0	0
Harpalus affinis (Schrank 1781)	2009	105	0.13	32	0.054	0	0	62	0.285	32	0.059
	2010	60	0.053	24	0.034	0	0	51	0.137	6	0.006
Harpalus albanicus Reitter 1900	2009	3	0.004	0	0	0	0	0	0	0	0
	2010	0	0	0	0	0	0	0	0	0	0
Harpalus anxius (Duftschmid 1812)	2009	27	0.033	12	0.02	2	0.011	103	0.473	5	0.009
	2010	71	0.063	28	0.04	0	0	69	0.185	14	0.014
Harpalus cupreus Dejean 1829	2009	0	0	0	0	0	0	1	0.005	0	0
	2010	0	0	4	0.006	0	0	6	0.016	1	0.001
Harpalus dimidiatus (P. Rossi 1790)	2009	1	0.001	0	0	0	0	0	0	0	0
	2010	3	0.003	1	0.001	0	0	3	0.008	7	0.007
Harpalus distinguendus (Duftschmid 1812)	2009	332	0.411	201	0.342	2	0.011	68	0.312	2	0.004
	2010	238	0.212	468	0.669	1	0.004	77	0.207	7	0.007
Harpalus luteicornis (Duftschmid 1812)	2009	13	0.016	0	0	0	0	6	0.028	7	0.013
	2010	1	0.001	5	0.007	1	0.004	26	0.07	21	0.022
Harpalus oblitus Dejean 1829	2009	2	0.002	7	0.012	0	0	1	0.005	2	0.004
	2010	0	0	4	0.006	0	0	45	0.121	0	0
Harpalus pumilus Sturm 1818	2009	0	0	0	0	0	0	0	0	0	0
	2010	2	0.002	0	0	0	0	0	0	0	0
Harpalus pygmaeus Dejean 1829	2009	10	0.012	13	0.022	0	0	1	0.005	2	0.004
	2010	7	0.006	13	0.019	0	0	2	0.005	3	0.003
Harpalus rubripes (Duftschmid 1812)	2009	8	0.01	0	0	0	0	14	0.064	22	0.041
	2010	62	0.055	8	0.011	1	0.004	34	0.091	31	0.032
Harpalus serripes (Quensel in Schönherr 1806)	2009	0	0	1	0.002	0	0	1	0.005	42	0.078
	2010	99	0.088	14	0.02	0	0	2	0.005	18	0.018
Harpalus tardus (Panzer 1797)	2009	22	0.027	2	0.003	0	0	6	0.028	5	0.009
	2010	37	0.033	13	0.019	0	0	3	0.008	9	0.009
Limodromus assimilis (Paykull 1790)	2009	0	0	0	0	0	0	0	0	1	0.002
	2010	0	0	0	0	0	0	0	0	262	0.268
Limodromus krynickii (Sperk 1835)	2009	0	0	0	0	0	0	0	0	2	0.004
	2010	0	0	0	0	0	0	0	0	48	0.049
Metallina lampros (Herbst 1784)	2009	0	0	8	0.014	0	0	1	0.005	9	0.017
	2010	0	0	0	0	0	0	0	0	31	0.032
Metallina properans (Stephens 1828)	2009	21	0.026	66	0.112	1	0.006	30	0.138	3	0.006
	2010	2	0.002	37	0.053	0	0	51	0.137	14	0.014
Microlestes corticalis (L. Dufour 1820)	2009	0	0	0	0	0	0	0	0	1	0.002
	2010	1	0.001	0	0	0	0	0	0	0	0
Microlestes minutulus (Goeze 1777)	2009	2	0.002	34	0.058	0	0	5	0.023	6	0.011
	2010	5	0.004	0	0	0	0	56	0.15	3	0.003
Nebria brevicollis (Fabricius 1792)	2009	0	0	0	0	0	0	0	0	1	0.002
	2010	0	0	0	0	0	0	0	0	0	0
Oodes helopioides (Fabricius 1792)	2009	1	0.001	0	0	0	0	3	0.014	3	0.006
	2010	1	0.001	1	0.001	0	0	4	0.011	2	0.002
Ophonus azureus (Fabricius 1775)	2009	0	0	0	0	0	0	0	0	0	0
	2010	0	0	1	0.001	0	0	0	0	0	0
Ophonus cribricollis (Dejean 1829)	2009	2	0.002	0	0	0	0	0	0	0	0
	2010	0	0	0	0	0	0	0	0	0	0
Ophonus diffinis (Dejean 1829)	2009	0	0	0	0	0	0	1	0.005	0	0
	2010	0	0	0	0	0	0	0	0	0	0
Ophonus parallelus (Dejean 1829)	2009	0	0	0	0	0	0	0	0	0	0
	2010	0	0	0	0	0	0	0	0	3	0.003
Panagaeus cruxmajor (Linné 1758)	2009	0	0	0	0	0	0	0	0	0	0
	2010	0	0	1	0.001	0	0	0	0	0	0
Paranchus albipes (Fabricius 1796)	2009	0	0	0	0	0	0	0	0	0	0
	2010	0	0	0	0	0	0	0	0	1	0.001
Parophonus hirsutulus (Dejean 1829)	2009	3	0.004	12	0.02	0	0	3	0.014	30	0.056
	2010	98	0.087	15	0.021	3	0.013	17	0.046	9	0.009
Parophonus maculicornis (Duftschmid 1812)	2009	9	0.011	0	0	0	0	0	0	0	0
	2010	42	0.037	9	0.013	0	0	2	0.005	3	0.003
Parophonus mendax (P. Rossi 1790)	2009	4	0.005	1	0.002	0	0	9	0.041	0	0
	2010	1	0.001	0	0	1	0.004	2	0.005	0	0
Parophonus planicollis (Dejean 1829)	2009	6	0.007	2	0.003	0	0	0	0	0	0
	2010	0	0	3	0.004	0	0	0	0	0	0
Patrobus atrorufus (Stroem 1768)	2009	133	0.165	3	0.005	0	0	0	0	4	0.007
	2010	112	0.1	8	0.011	21	0.093	0	0	33	0.034
Philochthus lunulatus (Geffroy in Fourcroy 1785)	2009	1	0.001	6	0.01	3	0.017	0	0	1	0.002
	2010	1	0.001	0	0	0	0	4	0.011	12	0.012
Poecilus cupreus (Linné 1758)	2009	117	0.145	526	0.895	0	0	952	4.373	532	0.989
	2010	36	0.032	1648	2.355	4	0.018	2125	5.7	187	0.191
Poecilus versicolor (Sturm 1824)	2009	4	0.005	5	0.009	12	0.067	133	0.611	317	0.589
	2010	3	0.003	80	0.114	12	0.053	159	0.427	300	0.307
Pseudoophonus griseus (Panzer 1796)	2009	25	0.031	35	0.06	1	0.006	1	0.005	1	0.002
	2010	183	0.163	14	0.02	1	0.004	20	0.054	5	0.005
Pseudoophonus rufipes (De Geer 1774)	2009	411	0.509	1688	2.871	10	0.056	538	2.471	250	0.465
	2010	692	0.615	7940	11.346	10	0.044	634	1.701	453	0.464
Pterostichus aterrimus (Herbst 1784)	2009	1	0.001	1	0.002	1	0.006	1	0.005	4	0.007
	2010	13	0.012	3	0.004	0	0	0	0	1	0.001
Pterostichus macer (Marsham 1802)	2009	0	0	0	0	0	0	0	0	0	0
	2010	1	0.001	0	0	0	0	0	0	0	0
Pterostichus melanarius (Illiger 1798)	2009	199	0.247	9	0.015	4	0.022	22	0.101	199	0.37
	2010	123	0.109	64	0.091	7	0.031	0	0	242	0.248
Pterostichus niger (Schaller 1783)	2009	339	0.42	71	0.121	24	0.134	5	0.023	144	0.268
	2010	289	0.257	151	0.216	66	0.291	14	0.038	189	0.194
Pterostichus nigrita (Paykull 1790)	2009	1	0.001	0	0	1	0.006	0	0	1	0.002
	2010	0	0	0	0	1	0.004	2	0.005	28	0.029
Pterostichus strenuus (Panzer 1797)	2009	22	0.027	2	0.003	8	0.045	0	0	4	0.007
	2010	1	0.001	15	0.021	75	0.331	26	0.07	110	0.113
Pterostichus vernalis (Panzer 1796)	2009	13	0.016	7	0.012	12	0.067	27	0.124	11	0.02
	2010	1	0.001	11	0.016	21	0.093	48	0.129	9	0.009
Sphaerotachys hoemorrhoidalis (Ponza 1805)	2009	0	0	3	0.005	0	0	0	0	0	0
	2010	0	0	0	0	0	0	0	0	1	0.001
Stenolophus mixtus (Herbst 1784)	2009	0	0	0	0	0	0	0	0	1	0.002
	2010	0	0	0	0	0	0	1	0.003	3	0.003
Stenolophus teutonus (Schrank 1781)	2009	77	0.095	393	0.668	2	0.011	4	0.018	1	0.002
	2010	71	0.063	36	0.051	2	0.009	17	0.046	2	0.002
Syntomus obscuroguttatus (Duftschmid 1812)	2009	0	0	8	0.014	0	0	10	0.046	14	0.026
	2010	0	0	8	0.011	0	0	127	0.341	23	0.024
Syntomus truncatellus (Linné 1761)	2009	0	0	3	0.005	0	0	0	0	1	0.002
	2010	0	0	0	0	0	0	0	0	4	0.004
Synuchus vivalis (Illiger 1798)	2009	0	0	0	0	0	0	0	0	0	0
	2010	0	0	0	0	0	0	0	0	1	0.001
Trechus quadristriatus (Schrank 1781)	2009	0	0	0	0	1	0.006	0	0	0	0
	2010	0	0	0	0	3	0.013	1	0.003	2	0.002
Total	2009	2685	3.327	5330	9.066	104	0.582	2163	9.936	1780	3.309
	2010	2721	2.418	12378	17.69	252	1.112	4208	11.29	2487	2.547
Species richness	2009	55		52		24		42		55
	2010	51		55		28		54		61
